# Supplementary figures and images for: Evaluation of efficacy of a new MEK inhibitor, RO4987655, in human tumor xenografts by [18F] FDG-PET imaging combined with proteomic approaches
Source: Springer Nature journal article supplement (doi:10.1186/s13550-014-0034-6), 2014-09-08

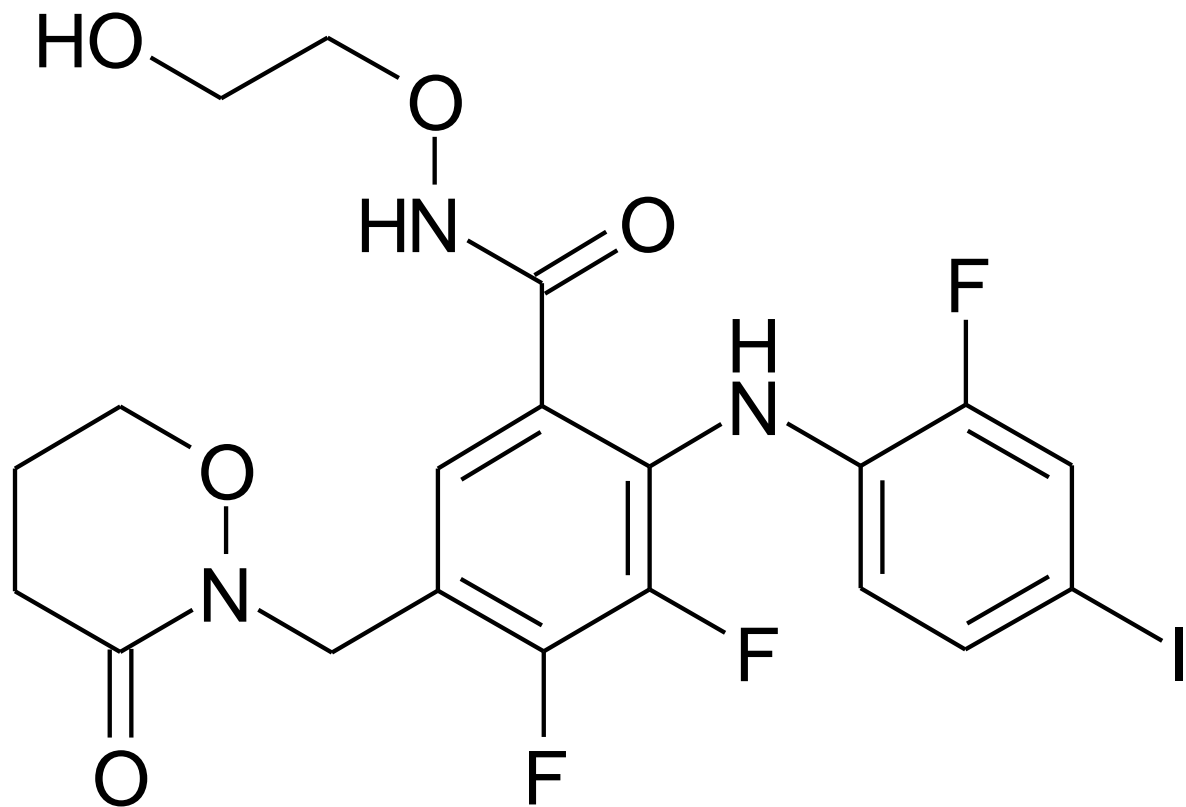

Supplement: MOESM1 [file 9786206]
